# Supplementary material
Source: Springer Nature journal article supplement (https://www.springermedizin.de/resource/supplementary/12885_2007_981_MOESM3_ESM.pdf/9471822)
Supplement: MOESM3 [file 9471822]

**Additional Table 3 Protein levels in PDAC compared to non-neoplastic ductal epithelia**

| Marker                       | High IHC score | PDAC (%)  | Duct (%)  | p-value           |
|------------------------------|----------------|-----------|-----------|-------------------|
| Plasma membrane              |                |           |           |                   |
| <b>EGFR</b>                  | $\geq 2$       | <b>69</b> | <b>36</b> | <b>0.02</b>       |
| <b>MET</b>                   | $\geq 1$       | <b>65</b> | <b>0</b>  | <b>&lt;0.0001</b> |
| Cytoplasm                    |                |           |           |                   |
| <b>ADAM9</b>                 | $\geq 3$       | <b>88</b> | <b>8</b>  | <b>&lt;0.001</b>  |
| <b>SRC</b>                   | $\geq 2$       | <b>58</b> | <b>4</b>  | <b>&lt;0.0001</b> |
| <b><math>\beta</math>CAT</b> | $\geq 2$       | <b>38</b> | <b>4</b>  | <b>0.005</b>      |
| <b>PKB<math>\beta</math></b> | $\geq 2$       | <b>65</b> | <b>16</b> | <b>0.0005</b>     |
| SMAD4                        | $\geq 2$       | 38        | 24        | 0.4               |
| <b>PTEN</b>                  | $\geq 1$       | <b>42</b> | <b>80</b> | <b>0.01</b>       |
| Nucleus                      |                |           |           |                   |
| <b>SMAD4</b>                 | $\geq 2$       | <b>35</b> | <b>84</b> | <b>0.0005</b>     |
| PTEN                         | $\geq 1$       | 50        | 68        | 0.2               |
| PKB $\beta$                  | $\geq 1$       | 15        | 4         | 0.3               |
| <b><math>\beta</math>CAT</b> | $\geq 1$       | <b>31</b> | <b>0</b>  | <b>0.004</b>      |

Listed are percentages of specimens with high levels of proteins based on a total of 26 PDAC and 25 non-neoplastic specimens. Highlighted are significant differences in proportions of PDAC compared to ducts in low and high protein expression levels using Fisher's exact test ( $p \leq 0.05$ ).
